# Metabolic snapshot of plasma samples reveals new pathways implicated in SARS-CoV-2 pathogenesis

Oihane E. Albyniga<sup>1¶</sup>, Daniel Jiménez<sup>2¶</sup>, Matilde Sónchez-Conde<sup>2</sup>, Pilar Vizcarra<sup>2</sup>, Raquel Ron<sup>2</sup>, Sabina Herrera<sup>2</sup>, Javier Martínez-Sanz<sup>2</sup>, Elena Moreno<sup>2</sup>, Santiago Moreno<sup>2</sup>, Coral Barbas<sup>1§\*</sup>, Sergio Serrano-Villar<sup>2§\*</sup>

<sup>1</sup> Centro de Metabolómica y Bioanálisis (CEMBIO), Facultad de Farmacia, Universidad San Pablo-CEU, CEU Universities, Urbanización Montepríncipe, Boadilla del Monte, 28660 Madrid, Spain.

<sup>2</sup> Servicio de Enfermedades Infecciosas, Hospital Universitario Ramón y Cajal, IRYCIS, Carretera de Colmenar Viejo km 9.100, 28034 Madrid, Spain.

<sup>¶</sup>Co-authors

<sup>§</sup>Co-senior authors

\*Corresponding authors: [Sergio Serrano-Villar](mailto:Sergio.Serrano-Villar@salud.madrid.org). Department of Infectious Diseases. Hospital Universitario Ramón y Cajal. Ctra. de Colmenar Viejo, km 9.100, 28034 Madrid, Spain. Email: [sergio.serrano@salud.madrid.org](mailto:sergio.serrano@salud.madrid.org). Coral Barbas. Centro de Metabolómica y Bioanálisis (CEMBIO), Facultad de Farmacia, Universidad San Pablo-CEU, CEU Universities, Urbanización Montepríncipe, Boadilla del Monte, 28660 Madrid, Spain. E-mail: [cbarbas@ceu.es](mailto:cbarbas@ceu.es).

## Abstract

Despite of the scientific and human efforts to understand COVID-19, there are questions still unanswered. Variations in the metabolic reaction to SARS-CoV-2 infection could explain the striking differences in the susceptibility to infection and the risk of severe disease. Here, we used untargeted metabolomics to examine novel metabolic pathways related to SARS-CoV-2 susceptibility and COVID-19 clinical severity using capillary electrophoresis coupled to a time-of-flight mass spectrometer (CE-TOF-MS) in plasma samples. We included 27 patients with confirmed COVID-19 early after symptom onset who were prospectively followed and 29 healthcare workers heavily exposed to SARS-CoV-2 but with low susceptibility to infection ('nonsusceptible'). We found that the metabolite profile was predictive of the study group. We identified a total of 55 metabolites as biomarkers of SARS-CoV-2 susceptibility or COVID-19 clinical severity. We report the discovery of new plasma biomarkers for COVID-19 that provide mechanistic explanations for the clinical consequences of SARS-CoV-2, including mitochondrial and liver dysfunction as a consequence of hypoxemia (citrulline, citrate, and BAIBA), energy production and

35 amino acid catabolism (L-glycine, L-alanine, L-serine, L-proline, L-aspartic acid and L-  
36 histidine), endothelial dysfunction and thrombosis (citrulline, L-ADMA, 2-AB, and  
37 Neu5Ac), and we found interconnections between these pathways. In summary, in  
38 this first report of the metabolomic profile of individuals with severe COVID-19 and  
39 SARS-CoV-2 susceptibility by CE-MS, we define several metabolic pathways  
40 implicated in SARS-CoV-2 susceptibility and COVID-19 clinical progression that could  
41 be developed as biomarkers of COVID-19.

42 **Keywords:** SARS-CoV-2; COVID-19; biomarkers; metabolomics; disease susceptibility;  
43 clinical progression; metabolites; oxidative stress response.

44

## 45 Introduction

46 Despite the effective response to the worst pandemic that humanity has faced in  
47 recent decades, the metabolic and biochemical processes during SARS-CoV-2  
48 infection remain poorly understood. Most studies that have thus far investigated the  
49 biochemical pathways affected by SARS-CoV-2 rely on powerful bioanalytical  
50 techniques. Using untargeted and targeted metabolomics, other groups have  
51 identified that disruption of lipid and amino acid metabolism, such as the kynurenine  
52 pathway, are potentially relevant pathways associated with COVID-19 pathogenesis  
53 (1–5). Other candidate pathways that could be involved in clinical progression include  
54 pyrimidine (1,2) and purine (1,6–8) metabolism, fructose, and mannose metabolism  
55 (1,7) and carbon metabolism (1,2,9), although the specific mechanism remains  
56 unclear. Overall, the necessity to elucidate the global snapshot of biochemical  
57 processes behind SARS-CoV-2 infection is still in progress.

58 Metabolomic profiling can be performed by mass spectrometry (MS) coupled to a  
59 separation technique such as liquid chromatography (LC-MS), gas chromatography  
60 (GC-MS) or capillary electrophoresis (CE-MS). CE-MS is used to study polar and  
61 ionizable compounds such as free modified amino acids (MAAs) and  
62 “epimetabolites”, which are side products of enzyme reactions. These MAAs or the  
63 appearance of epimetabolites has been associated with important alterations in  
64 cellular, physiological, and pathological processes(10–13). While CE-MS is a powerful  
65 method to characterize unknown mechanisms of disease progression, to our  
66 knowledge, it has not been used in individuals with COVID-19.

67 Here, we investigated novel metabolic pathways of SARS-CoV-2 susceptibility and  
68 COVID-19 clinical progression using CE-MS in longitudinal plasma samples from  
69 patients with COVID-19 with different disease severities and in a population of

70 healthcare workers heavily exposed to SARS-CoV-2 but with low susceptibility to  
71 infection.

## 72 **Results**

### 73 **General characteristics of the study population**

74 We included 63 adults, of whom 27 were in the COVID-19+ group and 36 were in the  
75 COVID-19- group, of whom 24 were nonsusceptible. COVID-19+ and susceptible  
76 patients were older and had a higher prevalence of comorbidities than COVID-19-  
77 and nonsusceptible patients. The general characteristics of the study population are  
78 described in **Table 1**.

**Table 1. General characteristics of the study population**

|                                                                  | COVID19-<br>(N=36) | COVID19+<br>(N=27) | Mild disease<br>(N=11) | Moderate disease<br>(N=11) | Severe disease<br>(N=5) | Non-susceptible<br>(N=28) | Susceptible<br>(N=31) | <i>p</i> -value<br>COVID19+ vs.<br>COVID19- | <i>p</i> -value (susceptible<br>vs. nonsusceptible) |
|------------------------------------------------------------------|--------------------|--------------------|------------------------|----------------------------|-------------------------|---------------------------|-----------------------|---------------------------------------------|-----------------------------------------------------|
| Age, median (P25-P75)                                            | 42 (36-51)         | 71 (55-85)         | 57 (50-75)             | 85 (75-89)                 | 71 (59-92)              | 43 (36-51)                | 66 (50-85)            | <0.001                                      | <0.001                                              |
| Sex, % women                                                     | 26 (72)            | 14 (52)            | 5 (45)                 | 6 (55)                     | 3 (60)                  | 22 (79)                   | 17 (55)               | 0.097                                       | 0.054                                               |
| Obese, N (%)                                                     | 2 (6)              | 7 (26)             | 3 (27)                 | 2 (18)                     | 2 (40)                  | 2 (7)                     | 7 (23)                | 0.022                                       | 0.100                                               |
| Hypertension, N (%)                                              | 2 (6)              | 14 (52)            | 6 (55)                 | 5 (45)                     | 3 (60)                  | 1 (4)                     | 14 (45)               | <0.001                                      | <0.001                                              |
| Previous lung disease, N (%)                                     | 2 (6)              | 3 (11)             | 1 (9)                  | 2 (18)                     | 0 (0)                   | 2 (7)                     | 3 (10)                | 0.841                                       | 0.698                                               |
| Previous heart disease, N (%)                                    | 1 (3)              | 6 (22)             | 2 (18)                 | 2 (18)                     | 2 (40)                  | 0 (0)                     | 6 (20)                | 0.017                                       | 0.012                                               |
| Days from onset of symptoms to hospitalization, median (P25-P75) | -                  | 4 (2-7)            | 7 (4-10)               | 3 (2-7)                    | 5 (3-6)                 | -                         | -                     | -                                           | -                                                   |

## 80 Differences in metabolic profiles according to COVID-19 81 disease status and SARS-CoV-2 susceptibility

82 Using an untargeted metabolomics approach and after data matrix filtration, 166  
83 features (pairs of  $m/z$  -RT) were obtained in plasma samples with proper  
84 reproducibility. We first evaluated the differences between the metabolomes of  
85 COVID-19+ and COVID-19- participants, as well as between susceptible and  
86 nonsusceptible individuals, by building principal component analysis (PCA) and  
87 partial least squares-discriminant analysis (PLS-DA) score plots. As shown in **Fig S1 AB**  
88 and **Fig S2 AB**, the metabolomes of COVID-19+ vs. COVID-19-, as well as susceptible  
89 vs. nonsusceptible participants, drastically differed, indicating that the metabolomic  
90 fingerprints predicted the study group. Then, we performed orthogonal partial least  
91 squares-discriminant analysis (OPLS-DA) and found that the separation was totally  
92 explained through PC1 (**Fig 1**). The  $p$ -values for the OPLS-DA models were  $2.10 \times 10^{-19}$   
93 and  $4.20 \times 10^{-17}$  for COVID-19 disease and COVID-19 susceptibility, respectively,  
94 corroborating previous observations. Using predefined statistical criteria for variable  
95 selection ( $VIP \geq 1$  and  $|p(\text{corr})| \geq 0.5$ ), we defined 10 metabolites predicting COVID-  
96 19 status and 11 predicting SARS-CoV-2 susceptibility (**Table S1**).

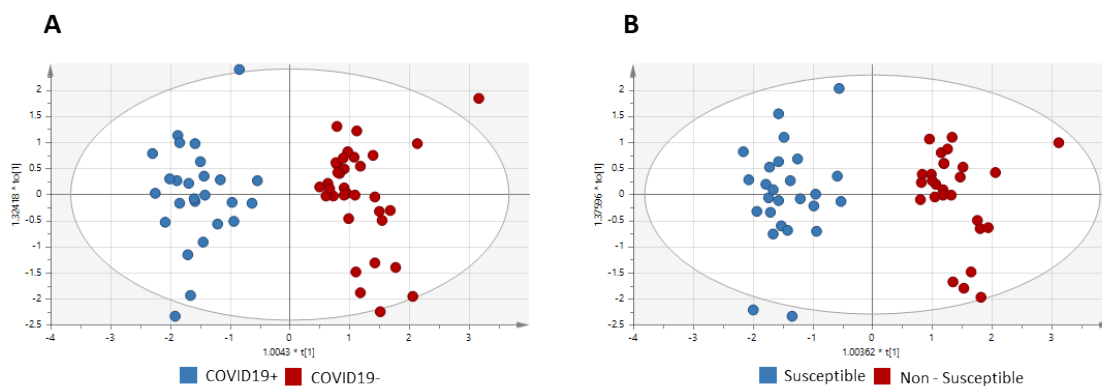

97

98 **Fig 1. Untargeted metabolomic profiles of COVID19+ vs COVID19- and susceptible vs.**  
99 **non-susceptible participants using supervised OPLS-DA models for CE-MS data. (A) Plot**

100 A represents the comparison of COVID-19+ and COVID-19- individuals ( $R^2 = 0.878$ ,  $Q^2 =$   
101  $0.813$ ), and CV-ANOVA ( $p$ -value =  $2.10 \times 10^{-19}$ ). (B) Plot B represents the comparison of  
102 susceptible and non-susceptible participants with  $R^2 = 0.902$ ,  $Q^2 = 0.817$ , and CV-  
103 ANOVA  $p$ -value =  $4.20 \times 10^{-17}$ . Models were validated by permutation testing and CV-  
104 ANOVA(14,15). Hydroxychloroquine, initially found to be significant, was removed  
105 from all statistical analysis as it was empirically used to treat COVID-19 at the time of  
106 sample collection.

107

## 108 **Metabolic profile differences associated with COVID-19**

### 109 **clinical severity**

110 We then performed subgroup analyses separating COVID-19+ participants by clinical  
111 severity. While no differences in untargeted metabolomic profiles were found in the  
112 PCA (**Fig S1 C**), inspection of the PLS-DA score plots (**Fig S2 C**) showed clear clustering  
113 that did not meet the prespecified validation criteria. Pairwise comparisons of OPLS-  
114 DA models of all 3 categories fulfilled the validation criteria, indicating that there were  
115 statistically significant differences in the metabolomes of mild vs. severe and between  
116 moderate vs. severe cases (**Fig 2**). Similar to other COVID-19 and susceptibility  
117 studies, a total of 8 metabolites, including creatine, citrulline and 6 unknown features,  
118 were identified as predictors of greater disease severity ( $VIP \geq 1$  and  $|p(\text{corr})| \geq 0.5$ )  
119 (**Table S1**).

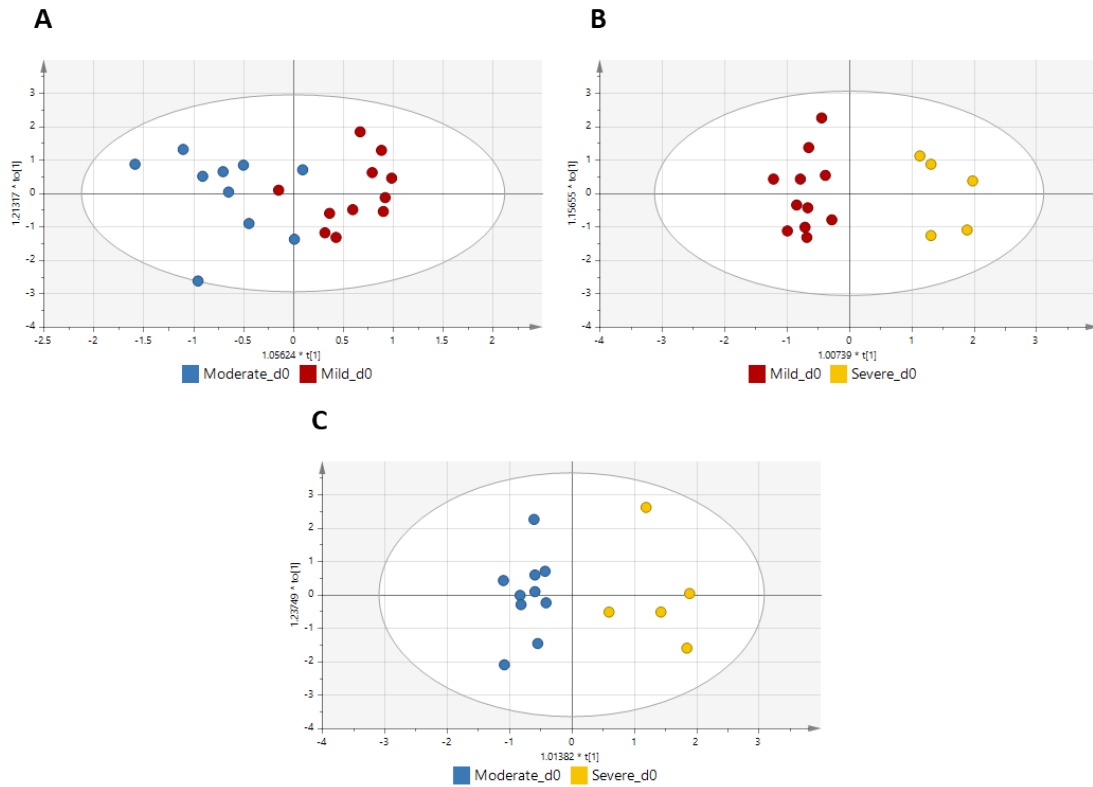

120

121 **Fig 2. Untargeted metabolomic profiles of participants with COVID19 according to**  
122 **clinical severity using supervised OPLS-DA models for CE-MS data. (A) Mild vs. moderate**  
123 **disease;  $R^2 = 0.713$ ,  $Q^2 = 0.009$ , and CV-ANOVA  $p$ -value = 0.997. (B) Mild vs. severe**  
124 **disease;  $R^2 = 0.929$ ,  $Q^2 = 0.675$ , and CV-ANOVA  $p$ -value = 0.010. (C) Moderate vs. severe**  
125 **disease;  $R^2 = 0.897$ ,  $Q^2 = 0.636$ , and CV-ANOVA  $p$ -value = 0.027.**

126

## 127 **Longitudinal changes in the metabolomes of participants with** 128 **COVID-19**

129 We then sought to assess the effect of time on the metabolomes of participants with  
130 COVID-19 following a similar strategy. A clear separation between baseline and day 8  
131 was found for mild and moderate cases (Fig S1 D1-D3; Fig S2 D1-D2). For severe cases,  
132 the PLS-DA model could not be fitted due to the limited availability of paired samples.



133 Validated OPLS-DA models (**Fig 3**) showed that the longitudinal differences detected  
134 for mild and moderate cases were statistically significant (CV-ANOVA  $p$ -value  $< 0.05$   
135 and  $R^2 - Q^2 < 0.3$ ). We found 10 metabolites whose abundance differed from baseline  
136 to day 8 in mild cases and 7 in moderate cases ( $VIP \geq 1$  and  $|p(\text{corr})| \geq 0.5$ ), see S1  
137 Table).

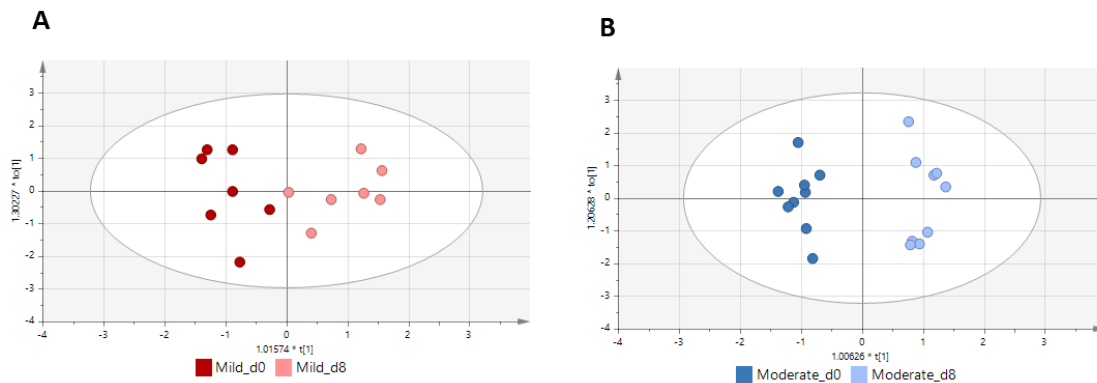

139 **Fig 3. Untargeted metabolomic profiles at baseline and day 8 of participants with mild**  
140 **and moderate COVID19 supervised OPLS-DA models for CE-MS data.** (A) Plot A  
141 represents the differences in mild cases ( $R^2 = 0.816$ ,  $Q^2 = 0.596$ ; CV-ANOVA  $p$ -value =  
142 0.062). (B) Plot B represents the differences in moderate cases ( $R^2 = 0.961$ ,  $Q^2 = 0.716$ ;  
143 CV-ANOVA  $p$ -value = 0.014).

144

## 145 **Complementary characterization of metabolomic predictors** 146 **of COVID-19 disease status and susceptibility**

147 To visually summarize the metabolite fingerprint associated with COVID-19 disease  
148 and SARS-CoV-2 susceptibility, we represented the abundance of the metabolites  
149 identified by univariate analysis followed by multivariate statistical analysis as  
150 predictors of each condition in heatmaps with hierarchical clustering (**Fig 4, Fig S3 and**  
151 **Fig S4**). As shown in the heatmap (**Fig 4**), COVID-19+ (mild, moderate, and severe

152 patients) had more similarities than COVID-19- individuals. The heatmap shows clear  
 153 patterns of the distinct metabolic biomarkers for each group.

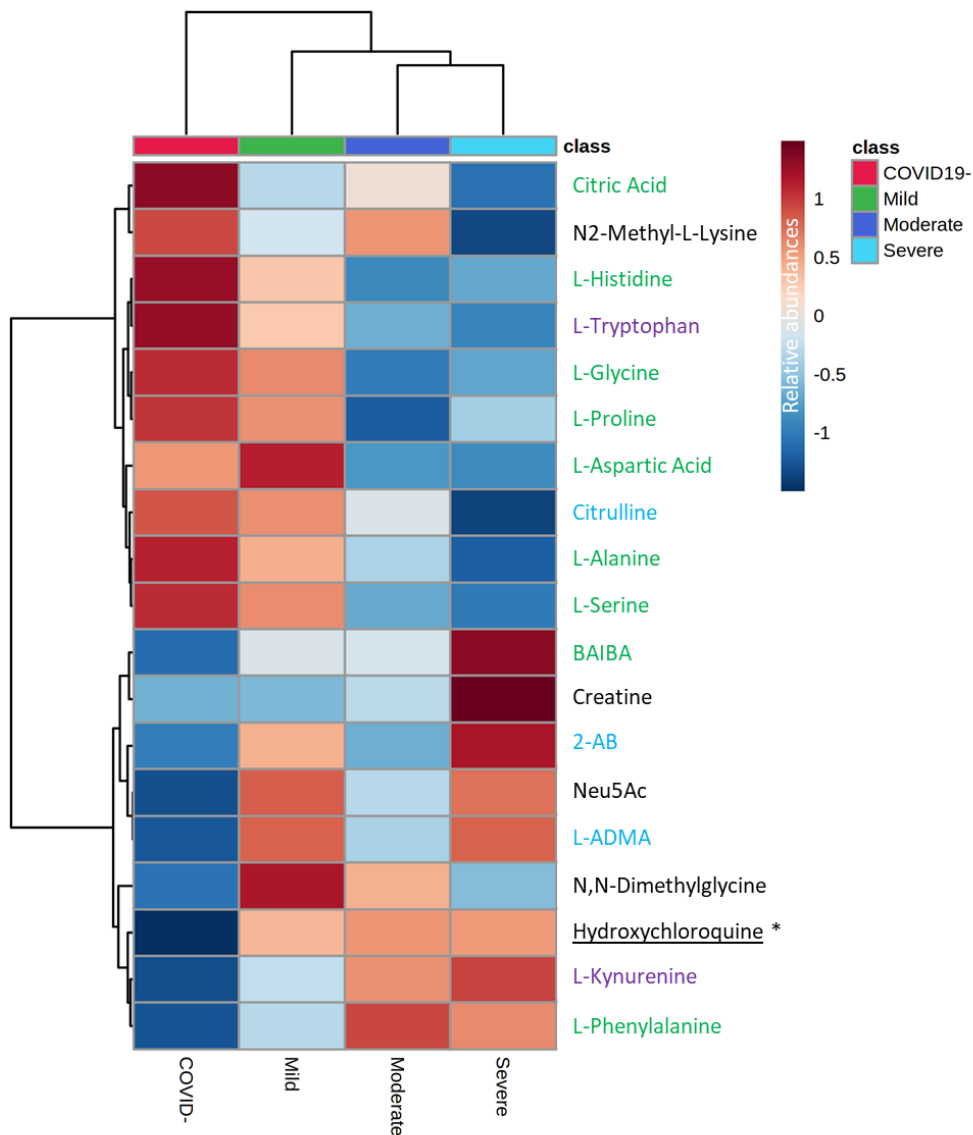

154

155 **Fig 4. Heatmap with group average of statistically significant metabolites detected in**  
 156 **human plasma samples by CE-MS modified by virus SARS-CoV-2 virus infection.** In green,  
 157 metabolites involved in TCA cycle. In purple, those involved in kynurenine pathway.  
 158 In blue those compounds of the nitric oxide or are related with NO regulation.

159

160 ANOVA-simultaneous component analysis (ASCA) identified age as the only factor  
161 significantly associated with the outcome. Thus, we further assessed the metabolites  
162 previously identified as predictors of COVID-19 disease severity or susceptibility  
163 controlling for age using ANCOVA (Tables S2 and S3). Of them, NG, NG'-dimethyl-L-  
164 arginine (L-SDMA), L-cystine and L-carnitine lost statistical significance. L-Kynurenine  
165 and citric acid remained significantly predictive of COVID-19 disease and SARS-CoV-2  
166 susceptibility, respectively. The selection of metabolites that could be fully  
167 characterized and their size effects are summarized in **Table 2**.

168 **Table 2. Fold change of metabolite abundance in plasma samples associated with COVID19 disease status and susceptibility.**

| Compound                  | COVID19+ vs. COVID19- | Susceptible vs. Nonsusceptible | Severe vs. Mild | COVID19+ day 8 vs baseline |
|---------------------------|-----------------------|--------------------------------|-----------------|----------------------------|
| L-Glycine                 | nssd                  | ↓ 0.86                         | nssd            | nssd                       |
| L-Alanine                 | ↓ 0.85                | ↓ 0.85                         | nssd            | nssd                       |
| N,N-Dimethylglycine       | nssd                  | nssd                           | nssd            | ↑ 1.21                     |
| 2-Aminobutyric acid       | ↑ 1.37                | nssd                           | nssd            | nssd                       |
| 3-Aminoisobutyric acid    | ↑ 1.66                | nssd                           | nssd            | nssd                       |
| L-Serine                  | ↓ 0.86                | ↓ 0.85                         | nssd            | nssd                       |
| L-Proline                 | ↓ 0.83                | ↓ 0.84                         | nssd            | nssd                       |
| Creatine                  | nssd                  | nssd                           | ↑ 2.47          | nssd                       |
| L-Aspartic acid           | nssd                  | ↓ 0.87                         | nssd            | nssd                       |
| L-Histidine               | ↓ 0.81                | ↓ 0.80                         | nssd            | nssd                       |
| N2-Methyl-L-Lysine        | nssd                  | nssd                           | nssd            | ↑ 1.5                      |
| L-Phenylalanine           | ↑ 1.16                | nssd                           | nssd            | nssd                       |
| Citrulline                | ↓ 0.81                | ↓ 0.80                         | ↓ 0.56          | nssd                       |
| Citric acid               | ↓ 0.80                | nssd                           | nssd            | nssd                       |
| NG,NG-Dimethyl-L-Arginine | ↑ 1.17                | nssd                           | nssd            | nssd                       |
| L-Tryptophan              | ↓ 0.68                | ↓ 0.67                         | nssd            | nssd                       |
| L-Kynurenine              | ↑ 1.53                | nssd                           | nssd            | nssd                       |
| N-Acetylneuraminic acid   | ↑ 1.81                | ↑ 1.8                          | nssd            | nssd                       |

169 Blue color denotes the fold change representing the increase of metabolite abundance and red color represents the decreases (see Table

170 S1 for additional information).

## 171 Discussion

172 To our knowledge, this study is the first to evaluate the plasma metabolomic profile of  
 173 individuals with severe COVID-19 and SARS-CoV-2 susceptibility by CE-MS. Our work  
 174 demonstrates the potential of CE-MS to unveil new plasma biomarkers of COVID-19 and  
 175 SARS-CoV-2 susceptibility and allows a deeper advancing of the metabolic consequences  
 176 of SARS-CoV-2 infection (Fig 5).

177

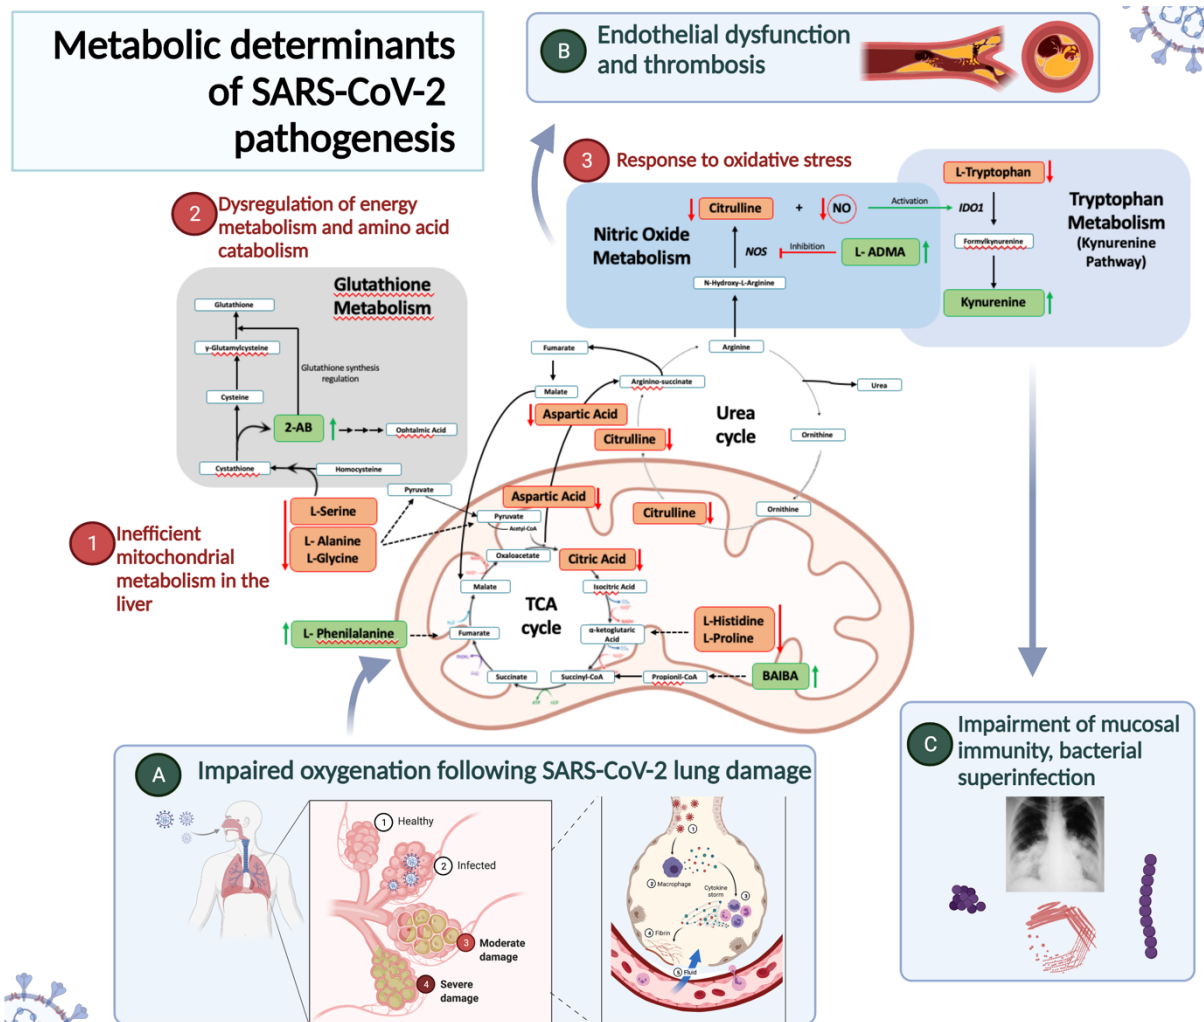

178

179 **Fig 5. A model of the metabolic pathways implicated in COVID19 pathogenesis.** Impairment  
 180 of blood oxygenation following SARS-CoV-2 damage results in 1) inefficient mitochondrial

181 metabolism in the liver, resulting in dysregulation of the urea cycle citrulline decreases,  
182 phenylalanine increases; 2) dysregulation of energy metabolism and amino acid  
183 metabolism, resulting in decreased L-serine, L-alanine, and L-serine; 3) activation of  
184 oxidative stress response, resulting in BAIBA accumulation, L-ADMA upregulation, and  
185 induction of the kynurenine pathway, which impairs mucosal immunity, allowing bacterial  
186 superinfections. Figure generated using biorender.com.

187 Among the significant metabolites, we found that the citrulline concentration decreases  
188 over the course of COVID-19 disease, but low levels early on in the course of the disease  
189 are associated with greater clinical severity. This finding is consistent with those reported  
190 in a recent work, where carbamoyl phosphate levels, a substrate for citrulline biosynthesis  
191 in the mitochondria of liver cells, decreased with greater disease severity (1). Because  
192 citrulline is an intermediate in the urea cycle and a byproduct of the enzymatic production  
193 of nitric oxide from arginine (16), these findings point to either dysregulation in the urea  
194 cycle or liver dysfunction as the underlying mechanism explaining the links between this  
195 metabolite and COVID-19. Furthermore, increased levels of circulating phenylalanine,  
196 which were found to be associated with COVID-19 in our study, have also been reported  
197 in patients with hepatic fibrosis, acute hepatic failure and hepatic encephalopathy as well  
198 as in COVID-19 disease (5).

199 Apart from phenylalanine, other amino acids (AAs) were found to be significantly different  
200 between the groups (Table 2). Among them, L-glycine, L-alanine, L-serine, L-proline, L-  
201 aspartic acid and L-histidine were downregulated in patients. Previous studies have  
202 revealed that SARS-CoV-2 infection dysregulates pathways linked to energy production and  
203 amino acid catabolism (17,18). In a murine model of SARS-CoV-2, Li *et al.* found several  
204 genes commonly downregulated in multiple organs that led to significant enrichment in  
205 pathways related to oxidative phosphorylation and the electron transport chain (17). As the  
206 tricarboxylic acid (TCA) cycle is connected to the electron transport chain, they also

207 analyzed genes associated with the TCA cycle. They found that several TCA cycle genes  
208 were downregulated and that TCA cycle metabolites were decreased in animal serum (17).

209 Apart from the AAs that lead to intermediates of the TCA cycle that were downregulated in  
210 the COVID-19+ group, the significant downregulation of citrate also suggested that SARS-  
211 CoV-2 results in inefficient mitochondrial metabolism (18,19), which can be interpreted as  
212 the metabolic response to impaired oxygenation secondary to lung damage (9). Citrate is a  
213 direct TCA cycle metabolite obtained by the action of citrate synthase from oxaloacetate.  
214 The gene encoding this enzyme exhibits decreased expression (17). Different genes,  
215 proteins and/or metabolites involved in the TCA cycle have been found to be suppressed  
216 or downregulated in individuals with COVID-19 (18,19).

217 An intriguing finding in our study is the upregulation of 3-aminoisobutyric acid (BAIBA)  
218 associated with COVID-19. BAIBA is a catabolite of thymine and valine metabolism that has  
219 been proposed as a novel regulator of carbohydrate and lipid metabolism associated with  
220 aerobic exercise (20). Although little is known about the implications of BAIBA in  
221 pathogenesis, the fact that two enantiomers of BAIBA (R-BAIBA and S-BAIBA) are ultimately  
222 metabolized in mitochondria further supports the idea that mitochondrial and TCA cycle  
223 abnormalities are a metabolic hallmark of COVID-19 pathogenesis, as also indicated by the  
224 abnormalities detected in amino acid and citrate metabolism (21). As BAIBA is primarily  
225 metabolized by mitochondria, the accumulation of BAIBA in patients with COVID-19 could  
226 be explained by a reduction in mitochondrial functionality and TCA cycle suppression  
227 following impairment of blood oxygenation. To our knowledge, BAIBA has never been  
228 proposed as a putative metabolite involved in COVID-19 disease. This result is of special  
229 interest not only to further investigate BAIBA as a novel biomarker for COVID-19 disease  
230 but also to elucidate its role in metabolism under physiological stress conditions or  
231 hypoxemia.

232 We also found evidence that SARS-CoV-2 affects metabolic pathways implicated in  
233 endothelial dysfunction, thrombosis, and cardiovascular disease. First, nitric oxide synthase  
234 (NOS) is an enzyme that catalyzes the production of citrulline and nitric oxide (NO) from  
235 arginine. This enzyme is inhibited by asymmetric dimethylarginine (L-ADMA), which is  
236 upregulated in COVID-19 patients and is an endogenous competitor of arginine, the nitric  
237 oxide precursor (22). L-ADMA has been associated with elevated oxidative stress (23). The  
238 higher L-ADMA concentrations found in individuals with COVID-19 suggest inhibition of  
239 NOS activity, which would ultimately result in decreased levels of NO. Because NO is  
240 among the principal redox molecules exploited by the immune system as a defensive  
241 mechanism, NO has been implicated in the control of viral replication, including that of  
242 HIV, influenza A and B, and vaccinia virus (24,25). Because it is as-yet unexplained how  
243 SARS-CoV-2 produces severe endothelial injury, widespread thrombosis and  
244 microangiopathy (26), our findings offer a new mechanistic explanation for this hallmark of  
245 SARS-CoV-2 pathogenesis and point to the nitric oxide synthesis pathway as a potential  
246 therapeutic target. Second, 2-aminobutyric acid (2-AB) and N-acetylneuraminic acid  
247 (Neu5Ac) were also upregulated in the COVID-19+ group. 2-AB is a marker that seems to  
248 be a compensatory mechanism to oxidative stress (27) and has been implicated in the  
249 modulation of glutathione metabolism in the myocardium (28). This finding indicates that  
250 2-AB deserves further attention as a biomarker of the myocardial dysfunction associated  
251 with COVID-19 (29). Finally, Neu5Ac is the most widespread form of sialic acids and is a  
252 family of compounds with a broad range of implications in human physiology (30). Because  
253 Neu5Ac concentrations have been correlated with the development of cardiovascular  
254 disease via RhoA signaling pathway activation (31,32), the fact that we found higher Neu5Ac  
255 concentrations associated with COVID-19 provides a new pathway possibly linked to the  
256 excess risk of cardiovascular diseases associated with SARS-CoV-2.

257 Inflammation gained early attention as a crucial mechanism of SARS-CoV-2 pathogenesis  
258 (33). Indoleamine-2,3-dioxygenase-1 (IDO1), which is involved in tryptophan catabolism via



259 the kynurenine pathway, is correlated with epithelial barrier disruption, bacterial  
260 translocation and inflammation in other viral infections (34). Induction of IDO1 results in  
261 the production of kynurenine derivatives with immunosuppressive effects, impairing  
262 mucosal immunity and promoting bacterial translocation and higher mortality (35).  
263 Impairment of the kynurenine pathway, resulting in reduced tryptophan (Trp) and elevated  
264 kynurenine (Kyn) levels associated with COVID-19, has previously been reported (3,7,36).  
265 Our data reveal not only the same tendency for Trp and Kyn but also the increasing  
266 tendency of the Kyn/Trp ratio with severity. This ratio has previously been associated with  
267 renal insufficiency in patients with SARS-CoV-2 and in many other diseases, such as  
268 inflammatory lung disease (5,37). Strikingly, IDO activity is induced by interferon-gamma  
269 (IFN- $\gamma$ ), as well as other cytokines and mediators (38,39), and it is inhibited in oxidative  
270 stress conditions by NO (39,40). Considering the reduction in NO synthesis mentioned  
271 previously, the alterations observed in the kynurenine pathway could be a result of the  
272 aforementioned metabolic abnormalities and result in further impairment of mucosal  
273 immunity, providing an explanation for the significant rates of bacterial pneumonia  
274 associated with COVID-19 (35).

275 The major strengths of our study include 1) the inclusion of COVID-19 cases in an early  
276 phase since the onset of symptoms, 2) the assessment of a special population of  
277 nonsusceptible individuals, 3) the high-throughput CE-MS method used to characterize the  
278 metabolome of the study participants, and 4) the inclusion of follow-up samples to assess  
279 the longitudinal variations of the plasma metabolites in a subset of participants. Our study  
280 is also subject to some limitations. First, the samples were collected during the first COVID-  
281 19 wave in Madrid. It is unknown yet whether the emerging SARS-CoV-2 variants could lead  
282 to different metabolic consequences. Second, as expected, cases in the severe group were  
283 older and had more comorbidities than milder cases, so we considered potential  
284 confounders in our statistical approach. Third, in the subgroup analyses separated by

285 clinical severity, the statistical power to detect differences in metabolite abundances was  
286 lower due to the smaller sample sizes.

287 In summary, in this work examining for the first time the metabolic changes associated with  
288 COVID-19 by CE-MS, we report the discovery of new plasma biomarkers for COVID-19 that  
289 provide mechanistic explanations for the clinical consequences of SARS-CoV-2, including  
290 mitochondrial and liver dysfunction as a consequence of hypoxemia (citrulline, citrate and  
291 BAIBA), energy production and amino acid catabolism (L-glycine, L-alanine, L-serine, L-  
292 proline, L-aspartic acid and L-histidine), and endothelial dysfunction and thrombosis  
293 (citrulline, L-ADMA, 2-AB, and Neu5Ac), and we found interconnections between these  
294 pathways (**Figure 5**). These biomarkers deserve further attention as biomarkers of SARS-  
295 CoV-2 susceptibility and COVID-19 clinical severity and as potential targets for  
296 interventions.

## 297 **Material and methods**

### 298 **Reagents**

299 All reagents, solvents and standards used for sample treatment and subsequent analysis are  
300 described in the Supporting Information.

### 301 **Patient enrollment and sample collection**

302 We analyzed data from adults recruited at Hospital Universitario Ramón y Cajal, Madrid,  
303 Spain. Participants had confirmed SARS-CoV-2 (COVID-19+ group) infection by PCR from  
304 nasopharyngeal swabs, sputum, or lower respiratory tract secretions within the first 7 days  
305 from the onset of symptoms and were classified according to clinical severity as follows:  
306 mild disease, defined as those without a need for supplemental oxygen and who were  
307 asymptomatic one week after diagnosis; moderate disease, defined as the presence of

308 bilateral radiologic infiltrates or opacities and clinical assessment requiring supplemental  
309 oxygen; and severe disease, defined as the development of acute respiratory distress  
310 syndrome (41). Hospitalized participants provided samples at baseline and 8 days later.  
311 Participants without SARS-CoV-2 (COVID-19- group) were asymptomatic subjects with a  
312 negative PCR from nasopharyngeal swabs. We considered adults to be “susceptible” when  
313 they had positive IgG for SARS-CoV-2 or previous COVID-19 confirmed by polymerase  
314 chain reaction (PCR) from nasopharyngeal exudate. Nonsusceptible adults were healthy  
315 healthcare workers who had been on duty for at least three months in COVID-19 wards or  
316 intensive care units and reported at least three high-risk exposures to SARS-CoV-2 (42)  
317 without having experienced symptoms suggestive of SARS-CoV-2 infection, were  
318 persistently negative for SARS-CoV-2 PCR testing and did not have SARS-CoV-2 IgM and  
319 IgG in plasma. The most frequent exposure was largely unprotected exposure to aerosol-  
320 generating procedures or patient secretions and close contact without face masks with  
321 other confirmed cases of COVID-19. We measured SARS-CoV-2 antibodies by indirect  
322 chemiluminescence immunoassay (Viracell, Granada, Spain).

323 Cryopreserved plasma was processed for virus inactivation by adding 1500  $\mu$ L of cold  
324 methanol:ethanol (MeOH:EtOH) in a 1:1 (v/v) proportion to 500  $\mu$ L of plasma. Then, samples  
325 were vortex-mixed for 1 min, incubated on ice for 5 min and centrifuged at 16,000  $\times$  g for 20  
326 min at 4 °C to precipitate and remove proteins. The clean upper layer or supernatant, which  
327 contained the metabolites of interest, was transferred to Eppendorf tubes and stored at -80  
328 °C until analysis.

## 329 **Sample treatment**

330 Two hundred microliters of frozen supernatant was thawed on ice and evaporated to  
331 dryness using a SpeedVac Concentrator System (Thermo Fisher Scientific, Waltham, MA).  
332 Then, it was resuspended in 100  $\mu$ L of 0.2 mM methionine sulfone (MetS) in 0.1 M formic  
333 acid. Samples were vortex-mixed for 1 min, transferred to a Millipore filter (30 kDa protein

334 cutoff) and centrifuged for 40 min at 2000  $xg$  at 4 °C. Finally, the ultrafiltrate was transferred  
335 to a CE-MS vial for analysis. Quality control samples (QC) were prepared by pooling equal  
336 volumes of plasma supernatant from each sample and were treated as previously  
337 described. Finally, blank solutions were also prepared with MeOH:EtOH (1:1, v/v).

## 338 **Nontargeted metabolomics by CE-MS**

339 The plasma metabolome was analyzed by using a 7100 capillary electrophoresis (CE) system  
340 coupled to a 6230 time-of-flight mass spectrometer (TOF-MS) from Agilent Technologies  
341 equipped with an electrospray ionization (ESI) source. The analysis was performed using a  
342 previously developed method (43) with the analytical conditions described in detail in the  
343 Supporting Information. The prepared QCs were analyzed at the beginning of the run to  
344 condition the CE system and then every seven randomized samples to reduce any time-  
345 related effect. The QCs were used not only to assess the reproducibility, stability and  
346 performance of the system but also to correct any signal deviation within the analytical  
347 sequence. A pair of blanks were injected at the beginning and end of the run to remove  
348 metabolites coming from the extraction solvent.

## 349 **Data processing**

350 CE-MS raw data were checked using MassHunter Qualitative software (version 10.0) to  
351 determine the data quality, the system mass accuracy and the reproducibility of the QC  
352 sample and IS injections. Then, raw data were aligned and processed with MassHunter  
353 Profinder software (version 10.0 SP1). Molecular feature extraction (MFE) and batch  
354 recursive feature extraction (RFE) algorithms, both included in MassHunter Profinder  
355 software, were used to obtain the list of mass-to-charge ratios ( $m/z$ ) and their  
356 corresponding abundances (43). The resulting list was imported in Microsoft Excel, and the  
357 data matrix was filtered before statistical analysis by removing metabolites with a

358 percentage of coefficient of variation (% CV) greater than 30% in the QC samples. All the  
359 data processing steps are described in detail in the Supporting Information.

## 360 **Statistics**

361 Multivariate (MVDA) and univariate (UVDA) statistical analyses were carried out to  
362 determine differences among groups. Different comparisons were performed to evaluate  
363 COVID-19 disease, disease severity, disease progression, and susceptibility. For this  
364 purpose, samples were labeled based on the comparison as infected or noninfected for  
365 disease diagnosis; susceptible or nonsusceptible for disease susceptibility; mild, moderate  
366 or severe at day 0 (d0) for disease severity; or day 0 and day 8 for disease progression. Then,  
367 the filtered matrix obtained in the previous step was processed by SIMCA-P version 15.0.2  
368 (Umetrics, Umea, Sweden), MATLAB software (The MathWorks, Maticks, MA, USA),  
369 MetaboAnalyst 5.0 and SPSS version 24 (IBM SPSS Statistics) for different purposes. When  
370 needed, the intensity drop was corrected with the QC correction function included in the  
371 toolbox freely available online at <https://github.com/Biospec/cluster-toolbox-v2.0>.  
372 Statistical analysis is described in more detail in the Supporting Information. Briefly,  
373 unsupervised PCA was performed to visualize tendencies, determine the presence of  
374 outliers, and assess data quality by the explained variance ( $R^2$ ) and the predicted variance  
375 ( $Q^2$ ), considering as an appropriate value a difference between them of lower than 0.3 (15).  
376 Then, the supervised methods PLS-DA and OPLS-DA were performed followed by model  
377 validation. In those validated OPLS-DA models, variable selection was performed by using  
378 a variable influence on projection (VIP) and absolute value of  $p(\text{corr})$  greater than 1.0 and  
379 0.5, respectively (14). Afterwards, UVDA was performed simultaneously to assess the  
380 significance of each metabolite separately. In short, nonparametric tests were applied for  
381 the comparisons previously mentioned as follows: a) the Kruskal-Wallis test for disease  
382 severity (mild, moderate, and severe patients at d0) followed by a multiple comparison test;  
383 b) the Wilcoxon signed-rank test for disease progression; and c) the Mann-Whitney U test

384 for COVID-19 disease and susceptibility. In all cases, the  $p$ -value had to be less than 0.05,  
385 and the false discovery rate at a level of  $\alpha = 0.05$  was controlled by the Benjamini-Hochberg  
386 correction test. Finally, ASCA was applied to study the influence associated with sex and  
387 age (44). When the ASCA model was not validated by permutation testing, analysis of  
388 covariance (ANCOVA) was carried out to eliminate the variability associated with age, sex  
389 or both (45).

## 390 **Metabolite identification**

391 The selected features in the statistical step by UVDA or MVDA were tentatively identified  
392 based on the  $m/z$  of the metabolites and the relative mobility time (RMT) ( $RT_{\text{metabolite}}/RT_{\text{MetS}}$ )  
393 by using the CEU Mass Mediator (<http://ceumass.eps.uspceu.es/mediator>) (46), which is an  
394 ‘in-house’ useful tool for identification. This tool joins several databases, which are  
395 available online, such as METLIN (47), LIPIDMAPS (48), and KEGG (49), making the  
396 identification task faster and easier. Features assigned to metabolites have to fulfill an  
397 appropriate mass accuracy (maximum error mass of 15 ppm), as well as a comparable  
398 isotopic pattern distribution. Once metabolites were identified, confirmation was  
399 performed by injecting commercial standards, samples, and samples spiked with standards.  
400 Finally, for fragmentation pattern recognition, the QC sample was analyzed under the same  
401 analytical conditions as used in the previous analysis but applying different voltages in the  
402 MS fragmentor (150, 175 and 200 V) (50). It is important to point out that any drug associated  
403 with COVID-19 treatments that was identified among the significant metabolites was  
404 excluded from both MVDA and UVDA statistical analysis.

## 405 **Study approval**

406 The study was carried out at the Ramón and Cajal University Hospital in Madrid (Spain) and  
407 was approved by the local Research Ethics Committee ([ceic.hrc@salud.madrid.org](mailto:ceic.hrc@salud.madrid.org),

408 approval number 095/20). All subject unable to provide informed consent or witnessed oral  
409 consent with written consents by a representative were excluded.

## 410 **Contributors**

411 O.E.A., S.S-V., and C.B study design and conceptualization; S.S-V., D.J., M.S-C., P.V., R.R.,  
412 S.H., J.M-S. and S.M. recruited and clinical follow-up; D.J. handling of clinical specimens  
413 and data mining; O.E.A., C.B., measurement of plasma metabolites; O.E.A. and S.S-V  
414 statistical analysis; O.E.A. and C.B bioinformatic analyses; O.E.A. writing of the first version  
415 of the manuscript. All the authors reviewed and approved the manuscript.

## 416 **Declaration of Interest**

417 Authors declare that no competing interests exist

## 418 **Acknowledgments**

419 We thank to all patients and healthcare workers who participated in the study.

## 420 **Fundings**

421 This work was supported by Instituto de Salud Carlos III (AC17/00019, PI18/00154,  
422 COV20/00349, ICI20/00058; PI21/00141), CRUE-Supera COVID, cofinanced by the European  
423 Development Regional Fund “A way to achieve Europe” (ERDF), Merck, Sharp & Dohme  
424 Investigator Studies Program (code MISP# IIS 60257), and Fondo Supera COVID-19 (2020-  
425 001).

## 426 **Data availability**

427 Participant's metadata and abundances of the key metabolites are displayed in the  
428 supplemental table as a supplementary data file.

## 429 **References**

- 430 1. Wu D, Shu T, Yang X, Song J-X, Zhang M, Yao C, et al. Plasma metabolomic and lipidomic  
431 alterations associated with COVID-19. *National Science Review* [Internet]. 2020;7(7):1157–68.  
432 Available from: <https://doi.org/10.1093/nsr/nwaa086>
- 433 2. Roberts I, Muelas MW, Taylor JM, Davison AS, Xu Y, Grixti JM, et al. Untargeted metabolomics  
434 of COVID-19 patient serum reveals potential prognostic markers of both severity and outcome.  
435 *medRxiv* [Internet]. 2020;2020.12.09.20246389. Available from:  
436 <http://medrxiv.org/content/early/2020/12/11/2020.12.09.20246389.abstract>
- 437 3. Thomas T, Stefanoni D, Reisz JA, Nemkov T, Bertolone L, Francis RO, et al. COVID-19 infection  
438 alters kynurenine and fatty acid metabolism, correlating with IL-6 levels and renal status. *JCI*  
439 *insight*. 2020 Jul 23;5(14):e140327. doi: 10.1172/jci.insight.140327.
- 440 4. Overmyer KA, Shishkova E, Miller IJ, Balnis J, Bernstein MN, Peters-Clarke TM, et al. Large-Scale  
441 Multi-omic Analysis of COVID-19 Severity. *Cell systems*. 2020;
- 442 5. Kimhofer T, Lodge S, Whiley L, Gray N, Loo RL, Lawler NG, et al. Integrative Modeling of  
443 Quantitative Plasma Lipoprotein, Metabolic, and Amino Acid Data Reveals a Multiorgan  
444 Pathological Signature of SARS-CoV-2 Infection. *Journal of proteome research*. 2020 Nov  
445 6;19(11):4442–54.
- 446 6. Delafiori J, Navarro LC, Siciliano RF, de Melo GC, Busanello ENB, Nicolau JC, et al. Covid-19  
447 Automated Diagnosis and Risk Assessment through Metabolomics and Machine Learning.  
448 *Analytical Chemistry*. 2021 Feb 2;93(4):2471–9.
- 449 7. Shen B, Yi X, Sun Y, Bi X, Du J, Zhang C, et al. Proteomic and Metabolomic Characterization of  
450 COVID-19 Patient Sera. *Cell*. 2020;182(1):59-72.e15.
- 451 8. Doğan HO, Şenol O, Bolat S, Yıldız ŞN, Büyüktuna SA, Sariismailoğlu R, et al. Understanding the  
452 pathophysiological changes via untargeted metabolomics in COVID-19 patients. *Journal of*  
453 *medical virology*. 2020 Dec 10;
- 454 9. Song JW, Lam SM, Fan X, Cao WJ, Wang SY, Tian H, et al. Omics-Driven Systems Interrogation  
455 of Metabolic Dysregulation in COVID-19 Pathogenesis. *Cell metabolism*. 2020 Aug 4;32(2):188-  
456 202.e5.
- 457 10. Mamani-Huanca M, Gradillas A, Gil de la Fuente A, López-González Á, Barbas C. Unveiling the  
458 Fragmentation Mechanisms of Modified Amino Acids as the Key for Their Targeted  
459 Identification. *Analytical Chemistry*. 2020 Apr 7;92(7):4848–57.



- 460 11. Khan AP, Rajendiran TM, Bushra A, Asangani IA, Athanikar JN, Yocum AK, et al. The Role of  
461 Sarcosine Metabolism in Prostate Cancer Progression. *Neoplasia* [Internet]. 2013;15(5):491-  
462 IN13. Available from: <https://www.sciencedirect.com/science/article/pii/S1476558613800358>
- 463 12. Wilson Tang WH, Tong W, Shrestha K, Wang Z, Levison BS, Delfraino B, et al. Differential effects  
464 of arginine methylation on diastolic dysfunction and disease progression in patients with  
465 chronic systolic heart failure. *European heart journal* [Internet]. 2008;29(20):2506–13.  
466 Available from: <https://doi.org/10.1093/eurheartj/ehn360>
- 467 13. Showalter MR, Cajka T, Fiehn O. Epimetabolites: discovering metabolism beyond building and  
468 burning. *Current opinion in chemical biology* [Internet]. 2017;36:70–6. Available from:  
469 <https://www.sciencedirect.com/science/article/pii/S1367593117300121>
- 470 14. Wheelock ÅM, Wheelock CE. Trials and tribulations of 'omics data analysis: assessing quality of  
471 SIMCA-based multivariate models using examples from pulmonary medicine. *Molecular*  
472 *bioSystems*. 2013 Nov;9(11):2589–96.
- 473 15. Godzien J, Ciborowski M, Angulo S, Barbas C. From numbers to a biological sense: How the  
474 strategy chosen for metabolomics data treatment may affect final results. A practical example  
475 based on urine fingerprints obtained by LC-MS. *Electrophoresis*. 2013 Oct;34(19):2812–26.
- 476 16. <https://www.uniprot.org/>.
- 477 17. Li S, Ma F, Yokota T, Garcia Jr G, Palermo A, Wang Y, et al. Metabolic reprogramming and  
478 epigenetic changes of vital organs in SARS-CoV-2-induced systemic toxicity. *JCI insight*. 2021 Jan  
479 25;6(2):e145027. doi: 10.1172/jci.insight.145027.
- 480 18. Krishnan S, Nordqvist H, Ambikan AT, Gupta S, Sperk M, Svensson-Akusjärvi S, et al. Implications  
481 of central carbon metabolism in SARS-CoV-2 replication and disease severity. *bioRxiv* [Internet].  
482 2021;2021.02.24.432759. Available from:  
483 <http://biorxiv.org/content/early/2021/02/24/2021.02.24.432759.abstract>
- 484 19. Páez-Franco C. J, Torres-Ruiz J, Sosa-Hernández A. V, Cervantes-Díaz R, Romero-Ramírez S,  
485 Pérez-Fragoso A, et al. Metabolomics analysis reveals a modified amino acid metabolism that  
486 correlates with altered oxygen homeostasis in COVID-19 patients. *Scientific reports* [Internet].  
487 2021;11(1):6350. Available from: <https://pubmed.ncbi.nlm.nih.gov/33737694>  
488 <https://www.ncbi.nlm.nih.gov/pmc/articles/PMC7973513/>
- 489 20. Tanianskii DA, Jarzebska N, Birkenfeld AL, O'Sullivan F. J, Rodionov RN. Beta-Aminoisobutyric  
490 Acid as a Novel Regulator of Carbohydrate and Lipid Metabolism. *Nutrients* [Internet].  
491 2019;11(3):524. Available from: <https://pubmed.ncbi.nlm.nih.gov/30823446>  
492 <https://www.ncbi.nlm.nih.gov/pmc/articles/PMC6470580/>
- 493 21. Stautemas J, van Kuilenburg ABP, Stroomer L, Vaz F, Blancquaert L, Lefevere FBD, et al. Acute  
494 Aerobic Exercise Leads to Increased Plasma Levels of R- and S-β-Aminoisobutyric Acid in  
495 Humans. *Frontiers in physiology*. 2019 Sep 25;10:1240.

- 496 22. Böger RH. Asymmetric dimethylarginine, an endogenous inhibitor of nitric oxide synthase,  
497 explains the “L-arginine paradox” and acts as a novel cardiovascular risk factor. *The Journal of*  
498 *nutrition*. 2004 Oct;134(10 Suppl):2842S-2847S; discussion 2853S.
- 499 23. Tsikas D, Bollenbach A, Hanff E, Kayacelebi AA. Asymmetric dimethylarginine (ADMA),  
500 symmetric dimethylarginine (SDMA) and homoarginine (hArg): the ADMA, SDMA and hArg  
501 paradoxes. *Cardiovascular diabetology*. 2018 Jan 4;17(1):1–x.
- 502 24. Wink DA, Hines HB, Cheng RY, Switzer CH, Flores-Santana W, Vitek MP, et al. Nitric oxide and  
503 redox mechanisms in the immune response. *Journal of leukocyte biology*. 2011 Jun;89(6):873–  
504 91.
- 505 25. Ibiza S, Serrador JM. The role of nitric oxide in the regulation of adaptive immune responses.  
506 *Inmunología* [Internet]. 2008;27(3):103–17. Available from:  
507 <https://www.sciencedirect.com/science/article/pii/S0213962608700581>
- 508 26. Ackermann M, Verleden SE, Kuehnel M, Haverich A, Welte T, Laenger F, et al. Pulmonary  
509 Vascular Endothelialitis, Thrombosis, and Angiogenesis in Covid-19. *The New England journal*  
510 *of medicine*. 2020 Jul 9;383(2):120–8.
- 511 27. Soga T, Baran R, Suematsu M, Ueno Y, Ikeda S, Sakurakawa T, et al. Differential metabolomics  
512 reveals ophthalmic acid as an oxidative stress biomarker indicating hepatic glutathione  
513 consumption. *The Journal of biological chemistry*. 2006 Jun 16;281(24):16768–76.
- 514 28. Irino Y, Toh R, Nagao M, Mori T, Honjo T, Shinohara M, et al. 2-Aminobutyric acid modulates  
515 glutathione homeostasis in the myocardium. *Scientific Reports* [Internet]. 2016;6(1):36749.  
516 Available from: <https://doi.org/10.1038/srep36749>
- 517 29. Kotecha T, Knight DS, Razvi Y, Kumar K, Vimallesvaran K, Thornton G, et al. Patterns of  
518 myocardial injury in recovered troponin-positive COVID-19 patients assessed by cardiovascular  
519 magnetic resonance. *European heart journal* [Internet]. 2021;42(19):1866–78. Available from:  
520 <https://doi.org/10.1093/eurheartj/ehab075>
- 521 30. Lehmann F, Tiralongo E, Tiralongo J. Sialic acid-specific lectins: occurrence, specificity and  
522 function. *Cellular and molecular life sciences : CMLS*. 2006 Jun;63(12):1331–54.
- 523 31. Li MN, Qian SH, Yao ZY, Ming SP, Shi XJ, Kang PF, et al. Correlation of serum N-Acetylneuraminic  
524 acid with the risk and prognosis of acute coronary syndrome: a prospective cohort study. *BMC*  
525 *cardiovascular disorders*. 2020 Sep 10;20(1):404-z.
- 526 32. Hu W, Xie J, Zhu T, Meng G, Wang M, Zhou Z, et al. Serum N-Acetylneuraminic Acid Is Associated  
527 with Atrial Fibrillation and Left Atrial Enlargement. *Cardiology research and practice*. 2020 Apr  
528 13;2020:1358098.
- 529 33. Fajgenbaum DC, June CH. Cytokine Storm. *N Engl J Med* [Internet]. 2020;383(23):2255–73.  
530 Available from: <https://doi.org/10.1056/NEJMra2026131>
- 531 34. Favre D, Mold J, Hunt PW, Kanwar B, Loke P, Seu L, et al. Tryptophan catabolism by indoleamine  
532 2,3-dioxygenase 1 alters the balance of TH17 to regulatory T cells in HIV disease. *Science*

- 533 translational medicine [Internet]. 2010;2(32):32ra36. Available from:  
534 <https://pubmed.ncbi.nlm.nih.gov/20484731>  
535 <https://www.ncbi.nlm.nih.gov/pmc/articles/PMC3034445/>
- 536 35. Byakwaga H, Boum 2nd Y, Huang Y, Muzoora C, Kembabazi A, Weiser SD, et al. The kynurenine  
537 pathway of tryptophan catabolism, CD4+ T-cell recovery, and mortality among HIV-infected  
538 Ugandans initiating antiretroviral therapy. *The Journal of infectious diseases*. 2014 Aug  
539 1;210(3):383–91.
- 540 36. Blasco H, Bessy C, Plantier L, Lefevre A, Piver E, Bernard L, et al. The specific metabolome  
541 profiling of patients infected by SARS-COV-2 supports the key role of tryptophan-nicotinamide  
542 pathway and cytosine metabolism. *Scientific reports*. 2020 Oct 8;10(1):16824–5.
- 543 37. Meyer KC, Arend RA, Kalayoglu M v, Rosenthal NS, Byrne GI, Brown RR. Tryptophan metabolism  
544 in chronic inflammatory lung disease. *The Journal of laboratory and clinical medicine*. 1995  
545 Dec;126(6):530–40.
- 546 38. Samelson-Jones BJ, Yeh SR. Interactions between nitric oxide and indoleamine 2,3-dioxygenase.  
547 *Biochemistry*. 2006 Jul 18;45(28):8527–38.
- 548 39. Badawy AA. Kynurenine Pathway of Tryptophan Metabolism: Regulatory and Functional  
549 Aspects. *International journal of tryptophan research: IJTR*. 2017 Mar  
550 15;10:1178646917691938.
- 551 40. Hucke C, MacKenzie CR, Adjogble KD, Takikawa O, Däubener W. Nitric oxide-mediated  
552 regulation of gamma interferon-induced bacteriostasis: inhibition and degradation of human  
553 indoleamine 2,3-dioxygenase. *Infection and immunity*. 2004 May;72(5):2723–30.
- 554 41. Fanelli V, Vlachou A, Ghannadian S, Simonetti U, Slutsky AS, Zhang H. Acute respiratory distress  
555 syndrome: new definition, current and future therapeutic options. *Journal of thoracic disease*  
556 [Internet]. 2013;5(3):326–34. Available from: <https://pubmed.ncbi.nlm.nih.gov/23825769>  
557 <https://www.ncbi.nlm.nih.gov/pmc/articles/PMC3698298/>
- 558 42. Prevention C for disease C and. Interim Operational Considerations for Public Health  
559 Management of Healthcare Workers Exposed to or with Suspected or Confirmed COVID-19:  
560 non-U.S. Healthcare Settings.
- 561 43. Naz S, Garcia A, Rusak M, Barbas C. Method development and validation for rat serum  
562 fingerprinting with CE-MS: application to ventilator-induced-lung-injury study. *Analytical and*  
563 *bioanalytical chemistry* [Internet]. 2013;405(14):4849–58. Available from:  
564 <http://europepmc.org/abstract/MED/23535741> <https://doi.org/10.1007/s00216-013-6882-5>
- 565 44. Smilde AK, Jansen JJ, Hoefsloot HC, Lamers RJ, van der Greef J, Timmerman ME. ANOVA-  
566 simultaneous component analysis (ASCA): a new tool for analyzing designed metabolomics  
567 data. *Bioinformatics (Oxford, England)*. 2005 Jul 1;21(13):3043–8.
- 568 45. Khammar A, Yarahmadi M, Madadzadeh F. What Is Analysis of Covariance (ANCOVA) and How  
569 to Correctly Report Its Results in Medical Research? *Iranian journal of public health* [Internet].

- 570 2020;49(5):1016–7. Available from: <https://pubmed.ncbi.nlm.nih.gov/32953697>  
571 <https://www.ncbi.nlm.nih.gov/pmc/articles/PMC7475615/>
- 572 46. Mamani-Huanca M, de la Fuente AG, Otero A, Gradillas A, Godzien J, Barbas C, et al. Enhancing  
573 confidence of metabolite annotation in Capillary Electrophoresis-Mass Spectrometry  
574 untargeted metabolomics with relative migration time and in-source fragmentation. *Journal of*  
575 *chromatographyA*. 2021 Jan 4;1635:461758.
- 576 47. Smith CA, O’Maille G, Want EJ, Qin C, Trauger SA, Brandon TR, et al. METLIN: a metabolite mass  
577 spectral database. *Therapeutic drug monitoring*. 2005 Dec;27(6):747–51.
- 578 48. Fahy E, Subramaniam S, Murphy RC, Nishijima M, Raetz CRH, Shimizu T, et al. Update of the  
579 LIPID MAPS comprehensive classification system for lipids. *Journal of lipid research* [Internet].  
580 2009;50 Suppl:S9–14. Available from: <https://pubmed.ncbi.nlm.nih.gov/19098281>  
581 <https://www.ncbi.nlm.nih.gov/pmc/articles/PMC2674711/>
- 582 49. Kanehisa M, Goto S. KEGG: kyoto encyclopedia of genes and genomes. *Nucleic acids research*.  
583 2000 Jan 1;28(1):27–30.
- 584 50. Godzien J, Armitage EG, Angulo S, Martinez-Alcazar MP, Alonso-Herranz V, Otero A, et al. In-  
585 source fragmentation and correlation analysis as tools for metabolite identification exemplified  
586 with CE-TOF untargeted metabolomics. *Electrophoresis*. 2015 Sep;36(18):2188–95.

587

## 588 **Figure Legends**

589 **Fig 1. Untargeted metabolomic profiles of COVID19+ vs COVID19- and susceptible vs. non-**  
590 **susceptible participants using supervised OPLS-DA models for CE-MS data.** (A) Plot A  
591 represents the comparison of COVID19+ and COVID19- individuals ( $R^2 = 0.878$ ,  $Q^2 = 0.813$ ),  
592 and CV-ANOVA ( $p$ -value =  $2.10 \times 10^{-19}$ ). (B) Plot B represents the comparison of susceptible  
593 and non-susceptible participants with  $R^2 = 0.902$ ,  $Q^2 = 0.817$ , and CV-ANOVA  $p$ -value =  $4.20$   
594  $\times 10^{-17}$ . Models were validated by permutation testing and CV-ANOVA (14,15).  
595 Hydroxychloroquine, initially found to be significant, was removed from all statistical  
596 analysis as it was empirically used to treat COVID19 at the time of sample collection.

597 **Fig 2. Untargeted metabolomic profiles of participants with COVID19 according to clinical**  
598 **severity using supervised OPLS-DA models for CE-MS data.** (A) Mild vs. moderate disease;  $R^2$   
599 = 0.713,  $Q^2 = 0.009$ , and CV-ANOVA  $p$ -value = 0.997. (B) Mild vs. severe disease;  $R^2 = 0.929$ ,

600  $Q^2 = 0.675$ , and CV-ANOVA  $p$ -value = 0.010. (C) Moderate vs. severe disease;  $R^2 = 0.897$ ,  $Q^2$   
601 = 0.636, and CV-ANOVA  $p$ -value = 0.027.

602 **Fig 3. Untargeted metabolomic profiles at baseline and day 8 of participants with mild and**  
603 **moderate COVID19 supervised OPLS-DA models for CE-MS data.** (A) Plot A represents the  
604 differences in mild cases ( $R^2 = 0.816$ ,  $Q^2 = 0.596$ ; CV-ANOVA  $p$ -value = 0.062). (B) Plot B  
605 represents the differences in moderate cases ( $R^2 = 0.961$ ,  $Q^2 = 0.716$ ; CV-ANOVA  $p$ -value =  
606 0.014).

607 **Fig 4. Heatmap with group average of statistically significant metabolites detected in human**  
608 **plasma samples by CE-MS modified by virus SARS-CoV-2 virus infection.** In green, metabolites  
609 involved in TCA cycle. In purple, those involved in kynurenine pathway. In blue those  
610 compounds of the nitric oxide or are related with NO regulation.

611 **Fig 5. A model of the metabolic pathways implicated in COVID19 pathogenesis.** Impairment  
612 of blood oxygenation following SARS-CoV-2 damage results in 1) inefficient mitochondrial  
613 metabolism in the liver, resulting in dysregulation of the urea cycle citrulline decreases,  
614 phenylalanine increases; 2) dysregulation of energy metabolism and amino acid  
615 metabolism, resulting in decreased L-serine, L-alanine, and L-serine; 3) activation of  
616 oxidative stress response, resulting in BAIBA accumulation, L-ADMA upregulation, and  
617 induction of the kynurenine pathway, which impairs mucosal immunity, allowing bacterial  
618 superinfections. Figure generated using biorender.com.

619

620
